# Supplementary material for: Altered Hippocampal Epigenetic Regulation Underlying Reduced Cognitive Development in Response to Early Life Environmental Insults
Source: MDPI journal article supplement (doi:10.3390/genes11020162), 2020-02-04
Supplement: s1 [file s1]

A

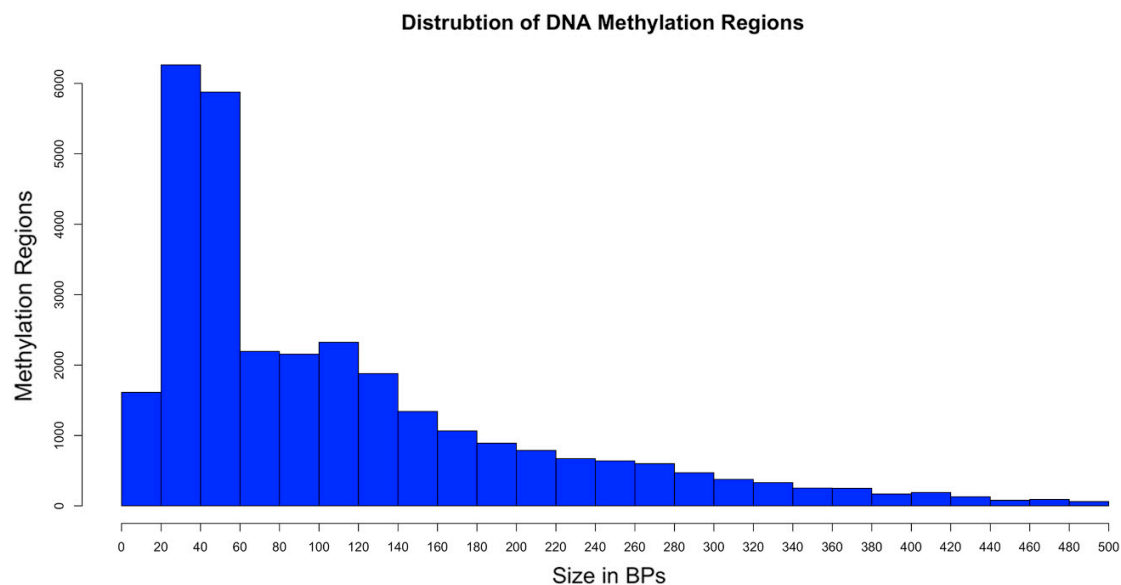

B

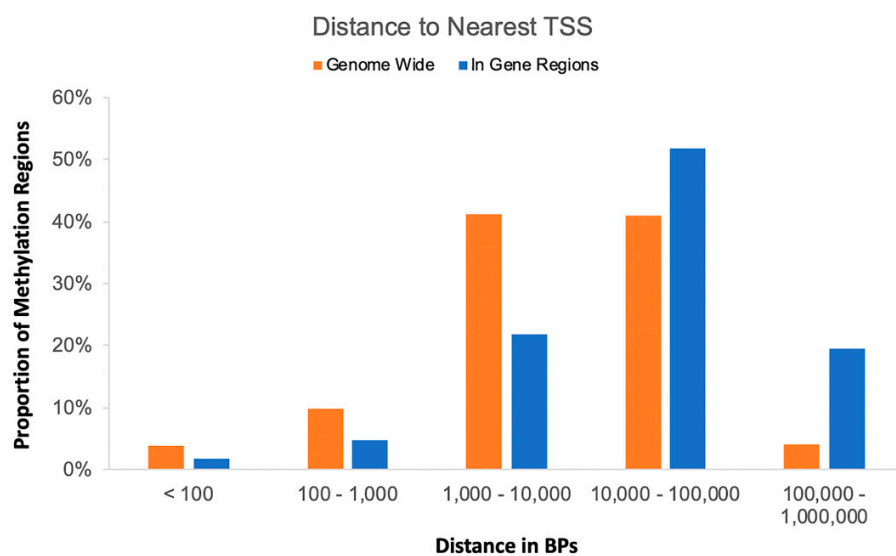

**Figure S1. Distribution of methylation regions.** (a) Distribution of DNA methylation regions based on size. (b) Distribution of DNA methylation regions based on distance to nearest TSS both pre- and post-filtering to remove regions located outside annotated gene regions.
